# Supplementary material for: HCV-coinfection is related to an increased HIV-1 reservoir size in cART-treated HIV patients: a cross-sectional study
Source: PubMed Central journal article supplement (PMC6447590; doi:10.1038/s41598-019-41788-9), 2019-04-03

**Type of manuscript:** Original

**Title:** HCV-coinfection is related to an increased HIV-1 reservoir size in cART-treated HIV patients: a cross-sectional study.

**Running head:** HCV-coinfection increases HIV-1 reservoir size

**Authors:** M<sup>a</sup> Rosa LÓPEZ-HUERTAS<sup>1</sup>, Claudia PALLADINO<sup>2</sup>, Marta GARRIDO-ARQUERO<sup>3</sup>, Beatriz ESTEBAN-CARTELLE<sup>3</sup>, Marta SÁNCHEZ-CARRILLO<sup>3</sup>, Paula MARTÍNEZ-ROMÁN<sup>3</sup>, Luz MARTÍN-CARBONERO<sup>4</sup>, Pablo RYAN<sup>5</sup>, Lourdes DOMÍNGUEZ-DOMÍNGUEZ<sup>6</sup>, Ignacio DE LOS SANTOS<sup>7</sup>, Sara DE LA FUENTE MORAL<sup>8</sup>, José Miguel BENITO<sup>9,10</sup>, Norma RALLÓN<sup>9,10</sup>, José ALCAMÍ<sup>11</sup>, Salvador RESINO<sup>3</sup>, Amanda FERNÁNDEZ-RODRÍGUEZ<sup>3¶</sup>, Mayte COIRAS<sup>11</sup>, Verónica BRIZ<sup>3</sup>, on behalf of the Multidisciplinary Group of viral coinfection HIV/Hepatitis (COVIHEP)\*

<sup>1</sup>Department of Infectious Diseases, Instituto Ramón y Cajal de Investigación Sanitaria (IRYCIS), Madrid, Spain.

<sup>2</sup>Research Institute for Medicines (iMed.Ulisboa), Faculty of Pharmacy, Universidade de Lisboa, Lisbon, Portugal.

<sup>3</sup>Unit of Viral Infection and Immunity, National Center for Microbiology, Institute of Health Carlos III, Majadahonda, Madrid, Spain.

<sup>4</sup>Instituto de Investigación Sanitaria Hospital de la Paz (IdiPAZ), Madrid, Spain.

<sup>5</sup>Department of Infectious Diseases, Infanta Leonor Hospital, Madrid, Spain.

<sup>6</sup>Unidad VIH. Servicio de Medicina Interna. Instituto de Investigación Biomédica del Hospital Doce de Octubre (imas12), Madrid, Spain.

<sup>7</sup>Servicio de Medicina Interna-Infeciosas. Hospital Universitario de La Princesa, Madrid, Spain.

<sup>8</sup>Servicio de Medicina Interna. Hospital Puerta de Hierro, Madrid, Spain.

<sup>9</sup>Instituto de Investigación Sanitaria Fundación Jiménez Díaz, Universidad Autónoma de Madrid (IIS-FJD, UAM), Madrid, Spain.

<sup>10</sup>Hospital Universitario Rey Juan Carlos, Móstoles, Spain.

<sup>11</sup>AIDS Immunopathology. Centro Nacional de Microbiología, Instituto de Salud Carlos III, Majadahonda, Madrid, Spain.

**† Corresponding author:**

Amanda Fernández-Rodríguez

Institute of Health Carlos III

National Center of Microbiology

Carretera Majadahonda-Pozuelo km 2.2

28220-Majadahonda (Madrid)

Spain

Email: amandafr@isciii.es

Telephone number: 0034918223892

Fax number: 0034915097966

**Alternative corresponding author:**

Verónica Briz

Institute of Health Carlos III

National Center of Microbiology

Carretera Majadahonda-Pozuelo km 2.2

28220-Majadahonda (Madrid)

Spain

Email: [veronica.briz@isciii.es](mailto:veronica.briz@isciii.es)

Telephone number: 0034918223892

Fax number: 0034915097966

**Supplemental Data 1.** Hospitals participating in this study.

Hospital Universitario La Paz, Madrid (41 patients); Hospital Universitario Doce de Octubre, Madrid (26 patients); Hospital Universitario Infanta Leonor, Madrid (17 patients); Hospital Universitario La Princesa, Madrid (8 patients); Hospital Universitario Puerta de Hierro, Madrid (5 patients).

**Supplemental Data 2.** Correlations between the HIV-1 proviral integration in rCD4 T cells and different epidemiological and clinical data.

| Epidemiological and Clinical data |                               |                         | Copies of HIV-1 DNA provirus/10 <sup>6</sup> rCD4 T cells |            |                 |                 |
|-----------------------------------|-------------------------------|-------------------------|-----------------------------------------------------------|------------|-----------------|-----------------|
|                                   |                               |                         | All patients                                              | HIV+ group | HIV+/HCV- group | HIV+/HCV+ group |
| Spearman's rho                    | Age (years)                   | Correlation Coefficient | 0.034                                                     | -0.087     | 0.080           | 0.099           |
|                                   |                               | Sig. (2-tailed)         | 0.742                                                     | 0.654      | 0.663           | 0.568           |
|                                   |                               | N                       | 97                                                        | 29         | 32              | 36              |
| Spearman's rho                    | Height (cm)                   | Correlation Coefficient | -0.059                                                    | 0.209      | 0.071           | -0.423          |
|                                   |                               | Sig. (2-tailed)         | 0.610                                                     | 0.350      | 0.732           | <b>0.020</b>    |
|                                   |                               | N                       | 78                                                        | 22         | 26              | 30              |
| Spearman's rho                    | Time of HIV infection (years) | Correlation Coefficient | -0.041                                                    | -0.506     | 0.087           | 0.092           |
|                                   |                               | Sig. (2-tailed)         | 0.695                                                     | 0.006      | 0.634           | 0.592           |
|                                   |                               | N                       | 96                                                        | 28         | 32              | 36              |
| Spearman's rho                    | CD4+ T cell count             | Correlation Coefficient | -0.091                                                    | -0.194     | 0.076           | -0.113          |
|                                   |                               | Sig. (2-tailed)         | 0.377                                                     | 0.313      | 0.680           | 0.513           |
|                                   |                               | N                       | 97                                                        | 29         | 32              | 36              |
| Spearman's rho                    | CD4+ %                        | Correlation Coefficient | -0.112                                                    | -0.125     | 0.065           | -0.174          |
|                                   |                               | Sig. (2-tailed)         | 0.275                                                     | 0.517      | 0.722           | 0.318           |
|                                   |                               | N                       | 96                                                        | 29         | 32              | 35              |
| Spearman's rho                    | Nadir CD4                     | Correlation Coefficient | -0.150                                                    | -0.184     | -0.130          | -0.133          |
|                                   |                               | Sig. (2-tailed)         | 0.181                                                     | 0.414      | 0.518           | 0.467           |
|                                   |                               | N                       | 81                                                        | 22         | 27              | 32              |
| Spearman's rho                    | Nadir CD4 %                   | Correlation Coefficient | -0.163                                                    | 0.113      | -0.051          | -0.583          |
|                                   |                               | Sig. (2-tailed)         | 0.233                                                     | 0.714      | 0.825           | <b>0.005</b>    |
|                                   |                               | N                       | 55                                                        | 13         | 21              | 21              |
| Spearman's rho                    | CD8+ T cell count             | Correlation Coefficient | 0.210                                                     | 0.274      | 0.257           | 0.113           |
|                                   |                               | Sig. (2-tailed)         | 0.120                                                     | 0.257      | 0.319           | 0.363           |
|                                   |                               | N                       | 56                                                        | 19         | 17              | 20              |
| Spearman's rho                    | CD8 %                         | Correlation Coefficient | 0.011                                                     | 0.063      | 0.038           | -0.119          |
|                                   |                               | Sig. (2-tailed)         | 0.934                                                     | 0.797      | 0.882           | 0.618           |
|                                   |                               | N                       | 56                                                        | 19         | 17              | 20              |
| Spearman's rho                    | CD4:CD8 Ratio                 | Correlation Coefficient | -0.174                                                    | -0.332     | 0.045           | -0.181          |
|                                   |                               | Sig. (2-tailed)         | 0.199                                                     | 0.165      | 0.865           | 0.445           |
|                                   |                               | N                       | 56                                                        | 19         | 17              | 20              |

**Supplemental Figure 1.** Correlations between the HIV-1 proviral integration in rCD4 T cells and time of HIV infection.

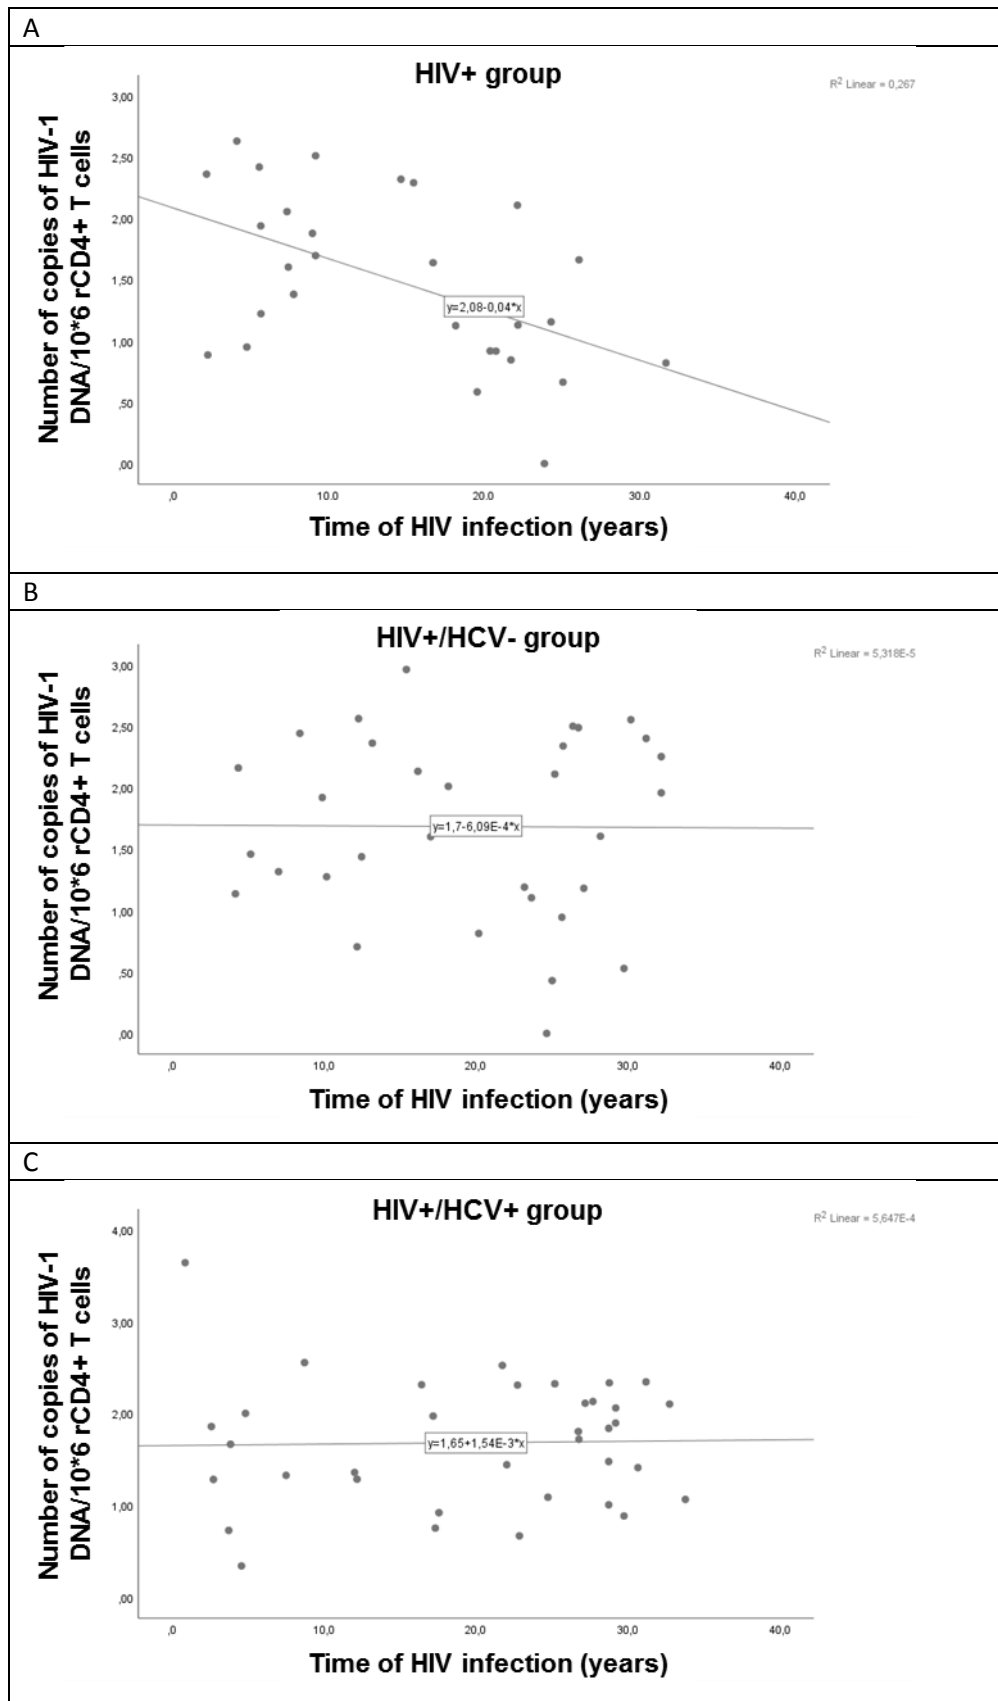

**Supplemental Figure 2.** Correlations between the HIV-1 proviral integration in rCD4 T cells and nadir of CD4 %.

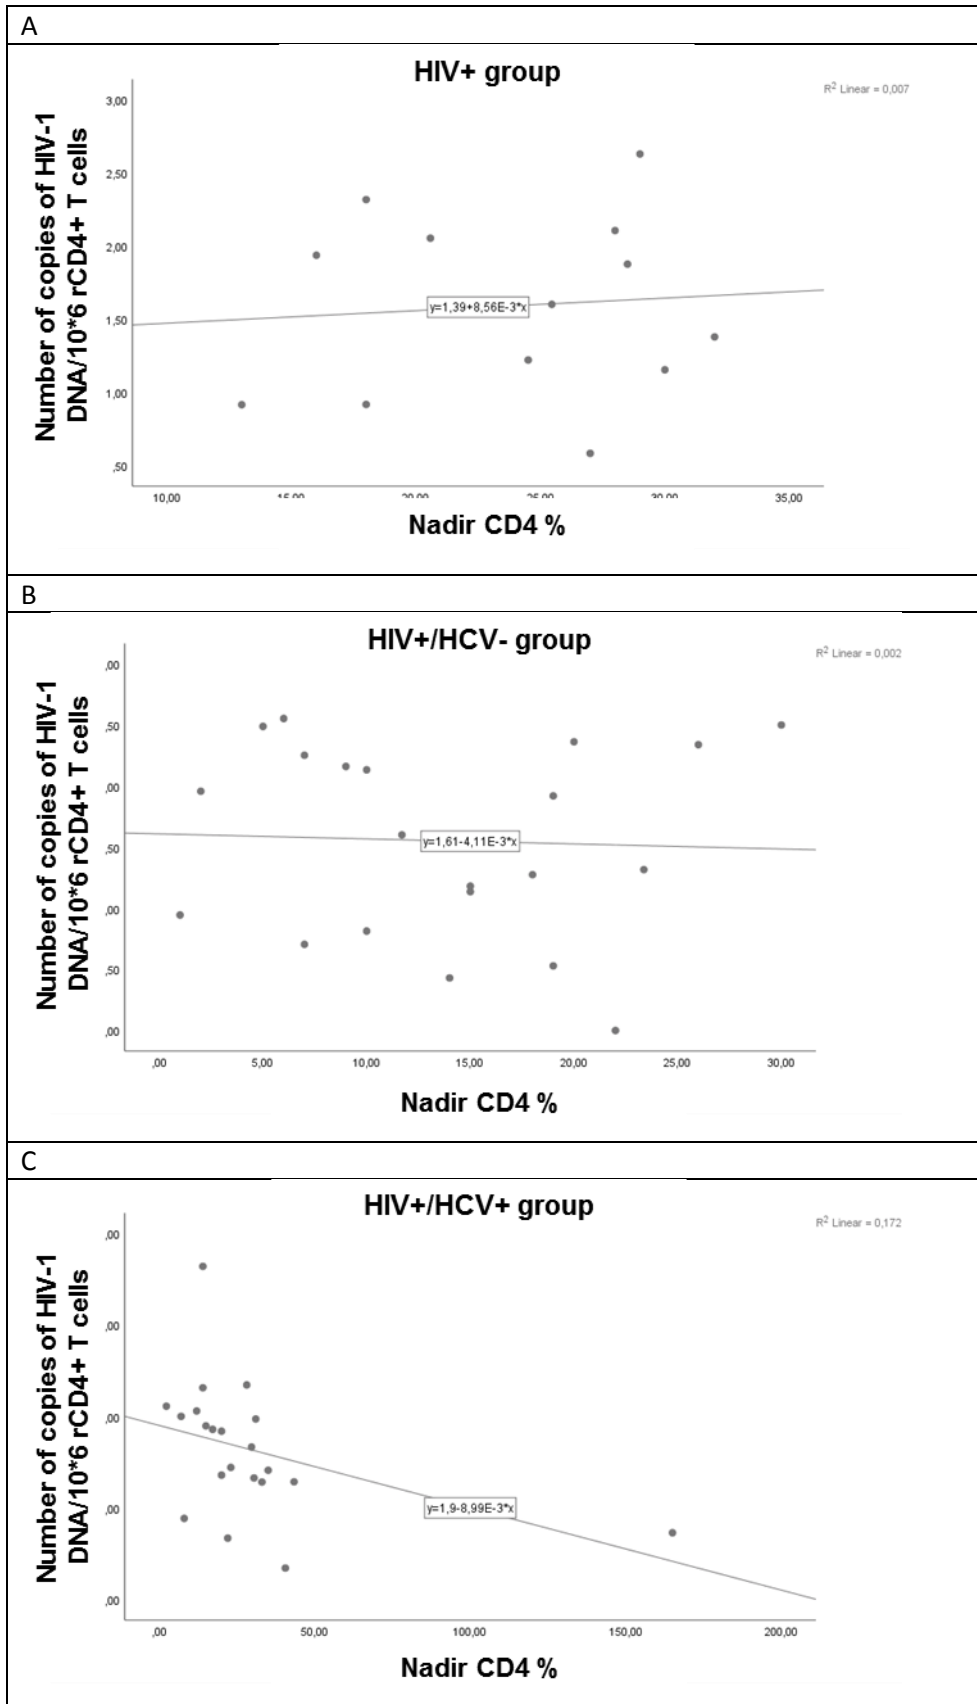

Supplement: 41598_2019_41788_MOESM1_ESM.pdf [file 41598_2019_41788_MOESM1_ESM.pdf]
